# Supplementary material for: The Effects of Magnetic Treatment On Seedling Growth, Nitrogen Metabolism, And Mineral Nutrient Contents In Populus×Euramericana 'Neva' Under Cadmium Stress
Source: Research Square preprint supplement (doi:10.21203/rs.3.rs-739553/v1), 2021-08-17
Supplement: Supplementary file 2 [file 73bb91a9c83a86b7ee62baf8.docx]

Figure S1 Activities of cytomembrane adenosine triphosphatase (ATPase, A) and ratios of K and Na (K/Na ratio) in tender leaves and fine roots irrigated with or without magnetized water and exposed to cadmium stress. Data in the table are the means ± *SE* of at least three replicates. Different lowercase letters indicate significant differences among the four treatments at the 0.05 level in leaves and roots.

Figure S2 Changes in cadmium contents (Cd, A) in tender leaves and fine roots and the biological transfer coefficient of Cd from roots to leaves (S/R, B) of ‘Neva’ irrigated with or without magnetized water and exposed to cadmium stress. Data in the table are the means ± *SE* of at least three replicates. Different lowercase letters indicate significant differences among the four treatments at the 0.05 level in leaves and roots.
